# Supplementary figures and images for: ETE: a python Environment for Tree Exploration
Source: Springer Nature journal article supplement (doi:10.1186/1471-2105-11-24), 2010-01-13

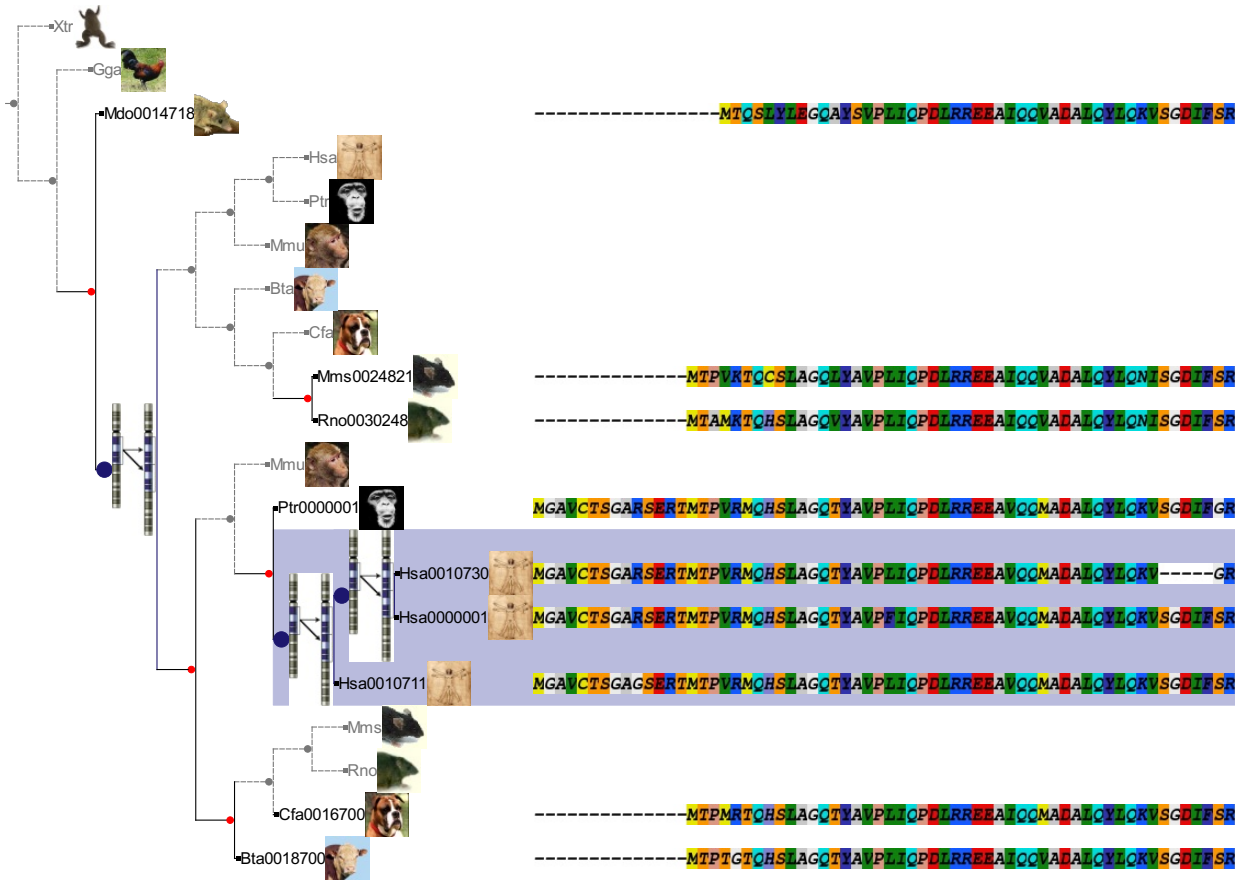

Supplement: 12859_2009_3481_MOESM1_ESM.pdf [file 12859_2009_3481_MOESM1_ESM.pdf]

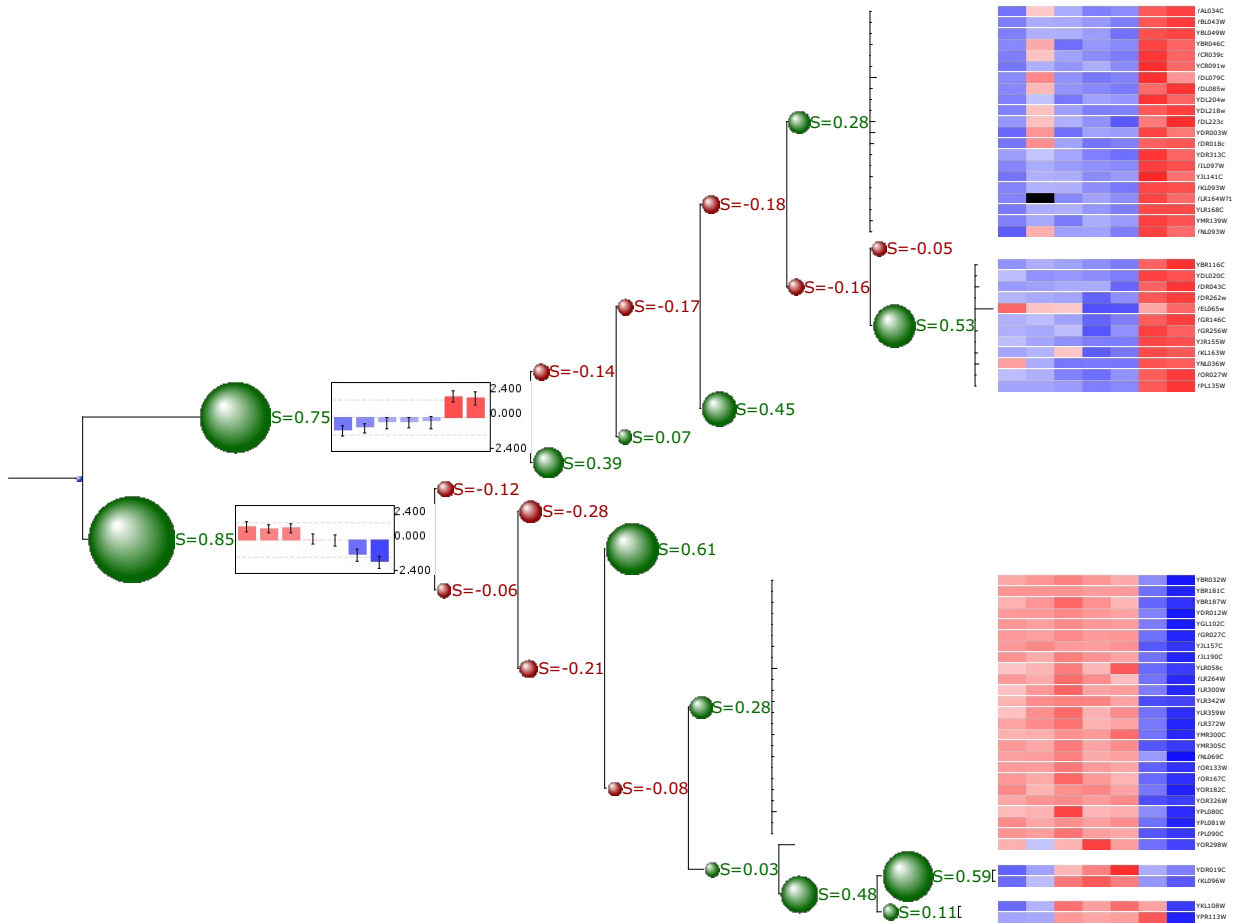

Supplement: 12859_2009_3481_MOESM2_ESM.pdf [file 12859_2009_3481_MOESM2_ESM.pdf]
